# Supplementary material
Source: PubMed Central journal article supplement (PMC3874594)
Supplement: NIHMS536953-supplement-ESI.pdf [file NIHMS536953-supplement-ESI.pdf]

Electronic Supplementary Information:

Unique Temporal and Spatial Biomolecular  
Emission Profile on Individual Zinc Oxide Nanorods

*Manpreet Singh, Sheng Song, and Jong-in Hahn\**

*Department of Chemistry, Georgetown University, 37<sup>th</sup> & O Sts. NW., Washington, DC 20057*

**Figure S1.** (a) Length and diameter distribution of the ZnO NRs used in biomolecular fluorescence analysis and (b) *FINE* observed from fluorescein isothiocyanate molecules on ZnO NR with no coupled proteins.

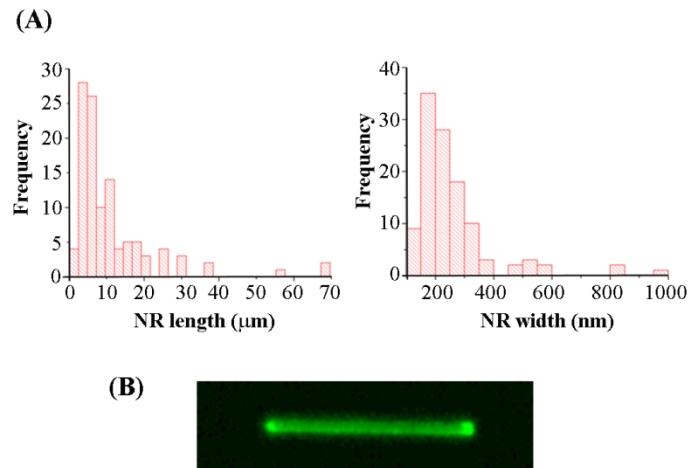

**Figure S2.** Full movies of FDTD radiation pattern from a dipole located 10 nm from the surface of a ZnO NR when dipole polarization is (a) parallel to the NR (b) in the transverse direction, and (c) perpendicular to the NR.

See attached files of mpeg movies
